# Supplementary material for: hnRNPC Promotes Oral Squamous Cell Carcinoma Progression via m6A-Dependent Stabilization of BCAT1 to Enhance Branched-Chain Amino Acid Metabolism
Source: Research Square preprint supplement (doi:10.21203/rs.3.rs-8676944/v1), 2026-02-11
Supplement: Supplementary file 1 [file d2a7e30b19b01420a7d163df.docx]

Supplementary Table 1: shRNA sequences

| YTHDC2 | shRNA#1: 5’-CTGGATGATGATGATAATGAA-3’ |
| --- | --- |
| shRNA#2: 5’-GCCTTCGTTCAGTATGTTAAT-3’ |
| METTL3 | shRNA#1: 5’-CCAGTCATAAACCAGATGAAA-3’ |
| shRNA#2: 5’-CGTCAGTATCTTGGGCAAGTT-3’ |

Supplementary Table 2: Primers used for qPCR

| hnRNPC | forward: 5’- TGGGCTGCTCTGTTCATAAGGG-3’ |
| --- | --- |
| reverse: 5’- CTCGGTTCACTTTTGGCTCTGC-3’ |
| BCAT1 | forward: 5’-GTGGAGTGGTCCTCAGAGTTT-3’ |
| reverse: 5’-AGCCAGGGTGCAATGACAG-3’ |
| β-Actin | forward: 5’-CATGTACGTTGCTATCCAGGC-3’ |
| reverse: 5’-CTCCTTAATGTCACGCACGAT-3’ |
| Sox-2 | forward: 5’-GCCGAGTGGAAACTTTTGTCG-3’ |
| reverse: 5’-GGCAGCGTGTACTTATCCTTCT-3’ |
| Nanog | forward: 5’-TTTGTGGGCCTGAAGAAAACT-3’ |
| reverse: 5’-AGGGCTGTCCTGAATAAGCAG-3’ |
| Oct4 | forward: 5’-CTTGAATCCCGAATGGAAAGGG-3’ |
| reverse: 5’-GTGTATATCCCAGGGTGATCCTC-3’ |

Supplementary Table 3: Primers used for m6A RIP qPCR

| BCAT1 (+70) | forward: 5’- GATGCTCCGCAGAGTGTA -3’ |
| --- | --- |
| reverse: 5’- TGGTAGCTGGTGTGACTATTAG -3’ |
| BCAT1 (+659) | forward: 5’- CCAGTGTCCCTGTGGGCCA -3’ |
| reverse: 5’- GAGATGAGCCGTAATTCCCTCCC-3’ |
| BCAT1 (+1221) | forward: 5’- GAGGATACAATGGAAAATAGA-3’ |
| reverse: 5’- ACTACAAACTACATTATGCAC-3’ |
| BCAT1(+4255) | forward: 5’- CCATGCTCTCTAGCACAGGAATG-3’ |
| reverse: 5’- CCTGATTCCTTAACAAGACTTC-3’ |
| BCAT1(+8438) | forward: 5’- CCTGAAGTTTTGCAAAGAG-3’ |
| reverse: 5’- CACAGGTTGACAGGGTCTGG -3’ |
